# Supplementary material
Source: PubMed Central journal article supplement (PMC4469648)
Supplement: NIHMS572829-supplement-Supp_Fig_S1.pdf [file NIHMS572829-supplement-Supp_Fig_S1.pdf]

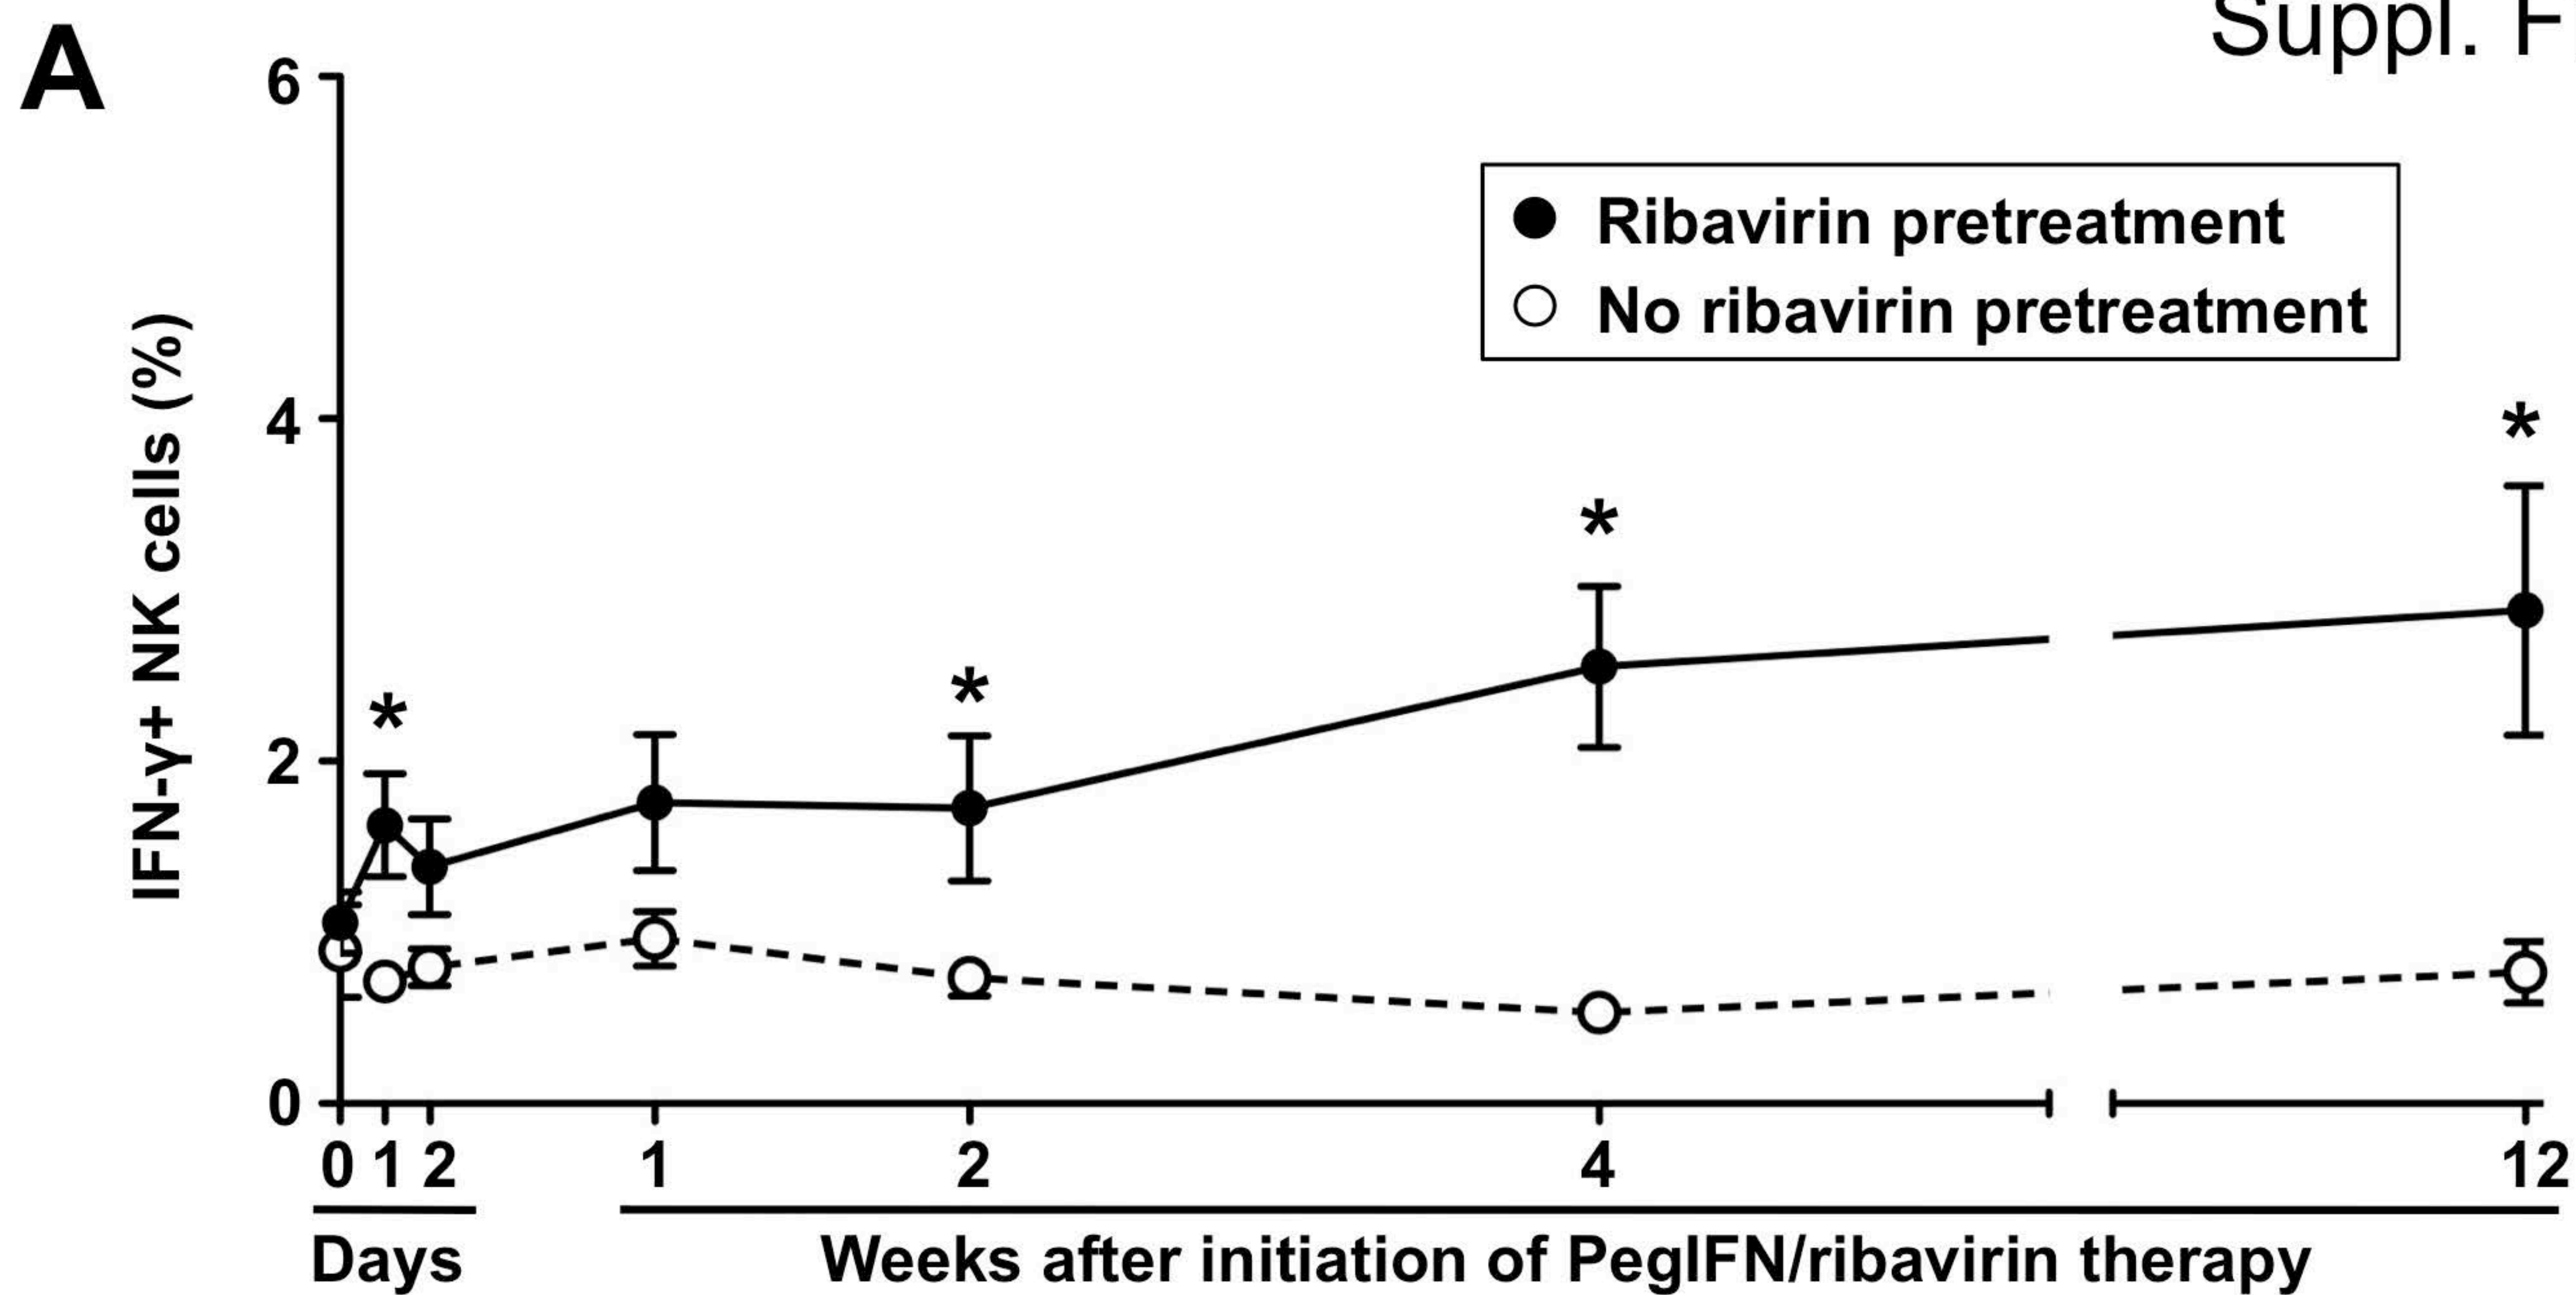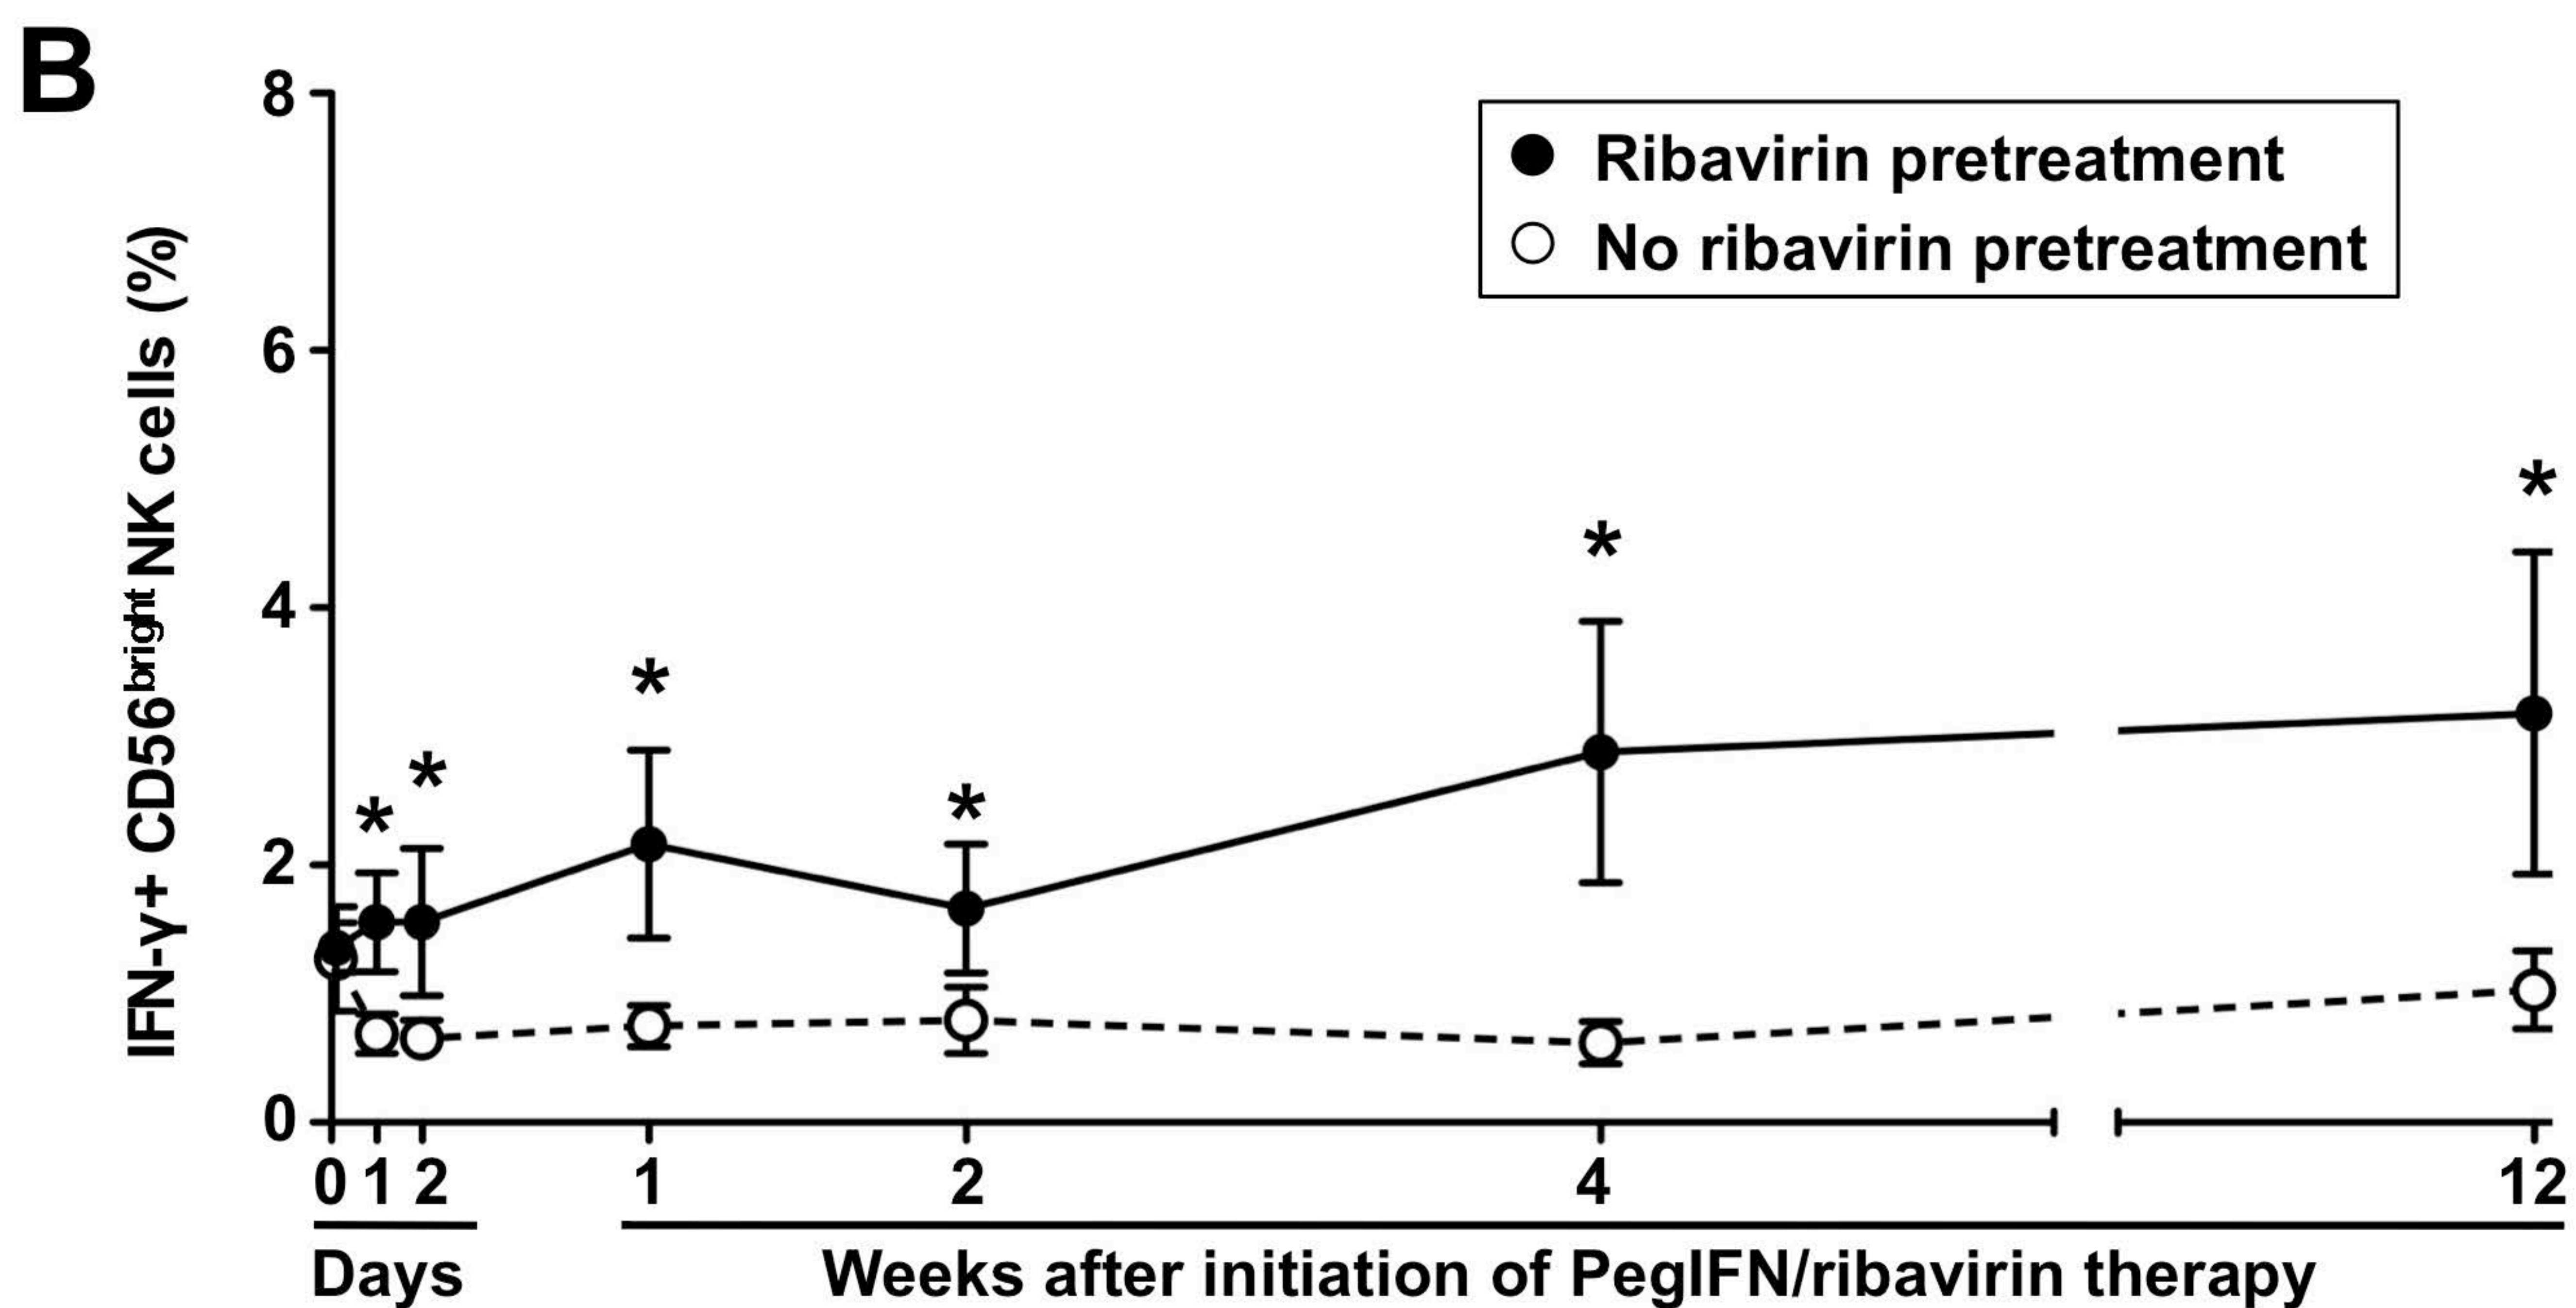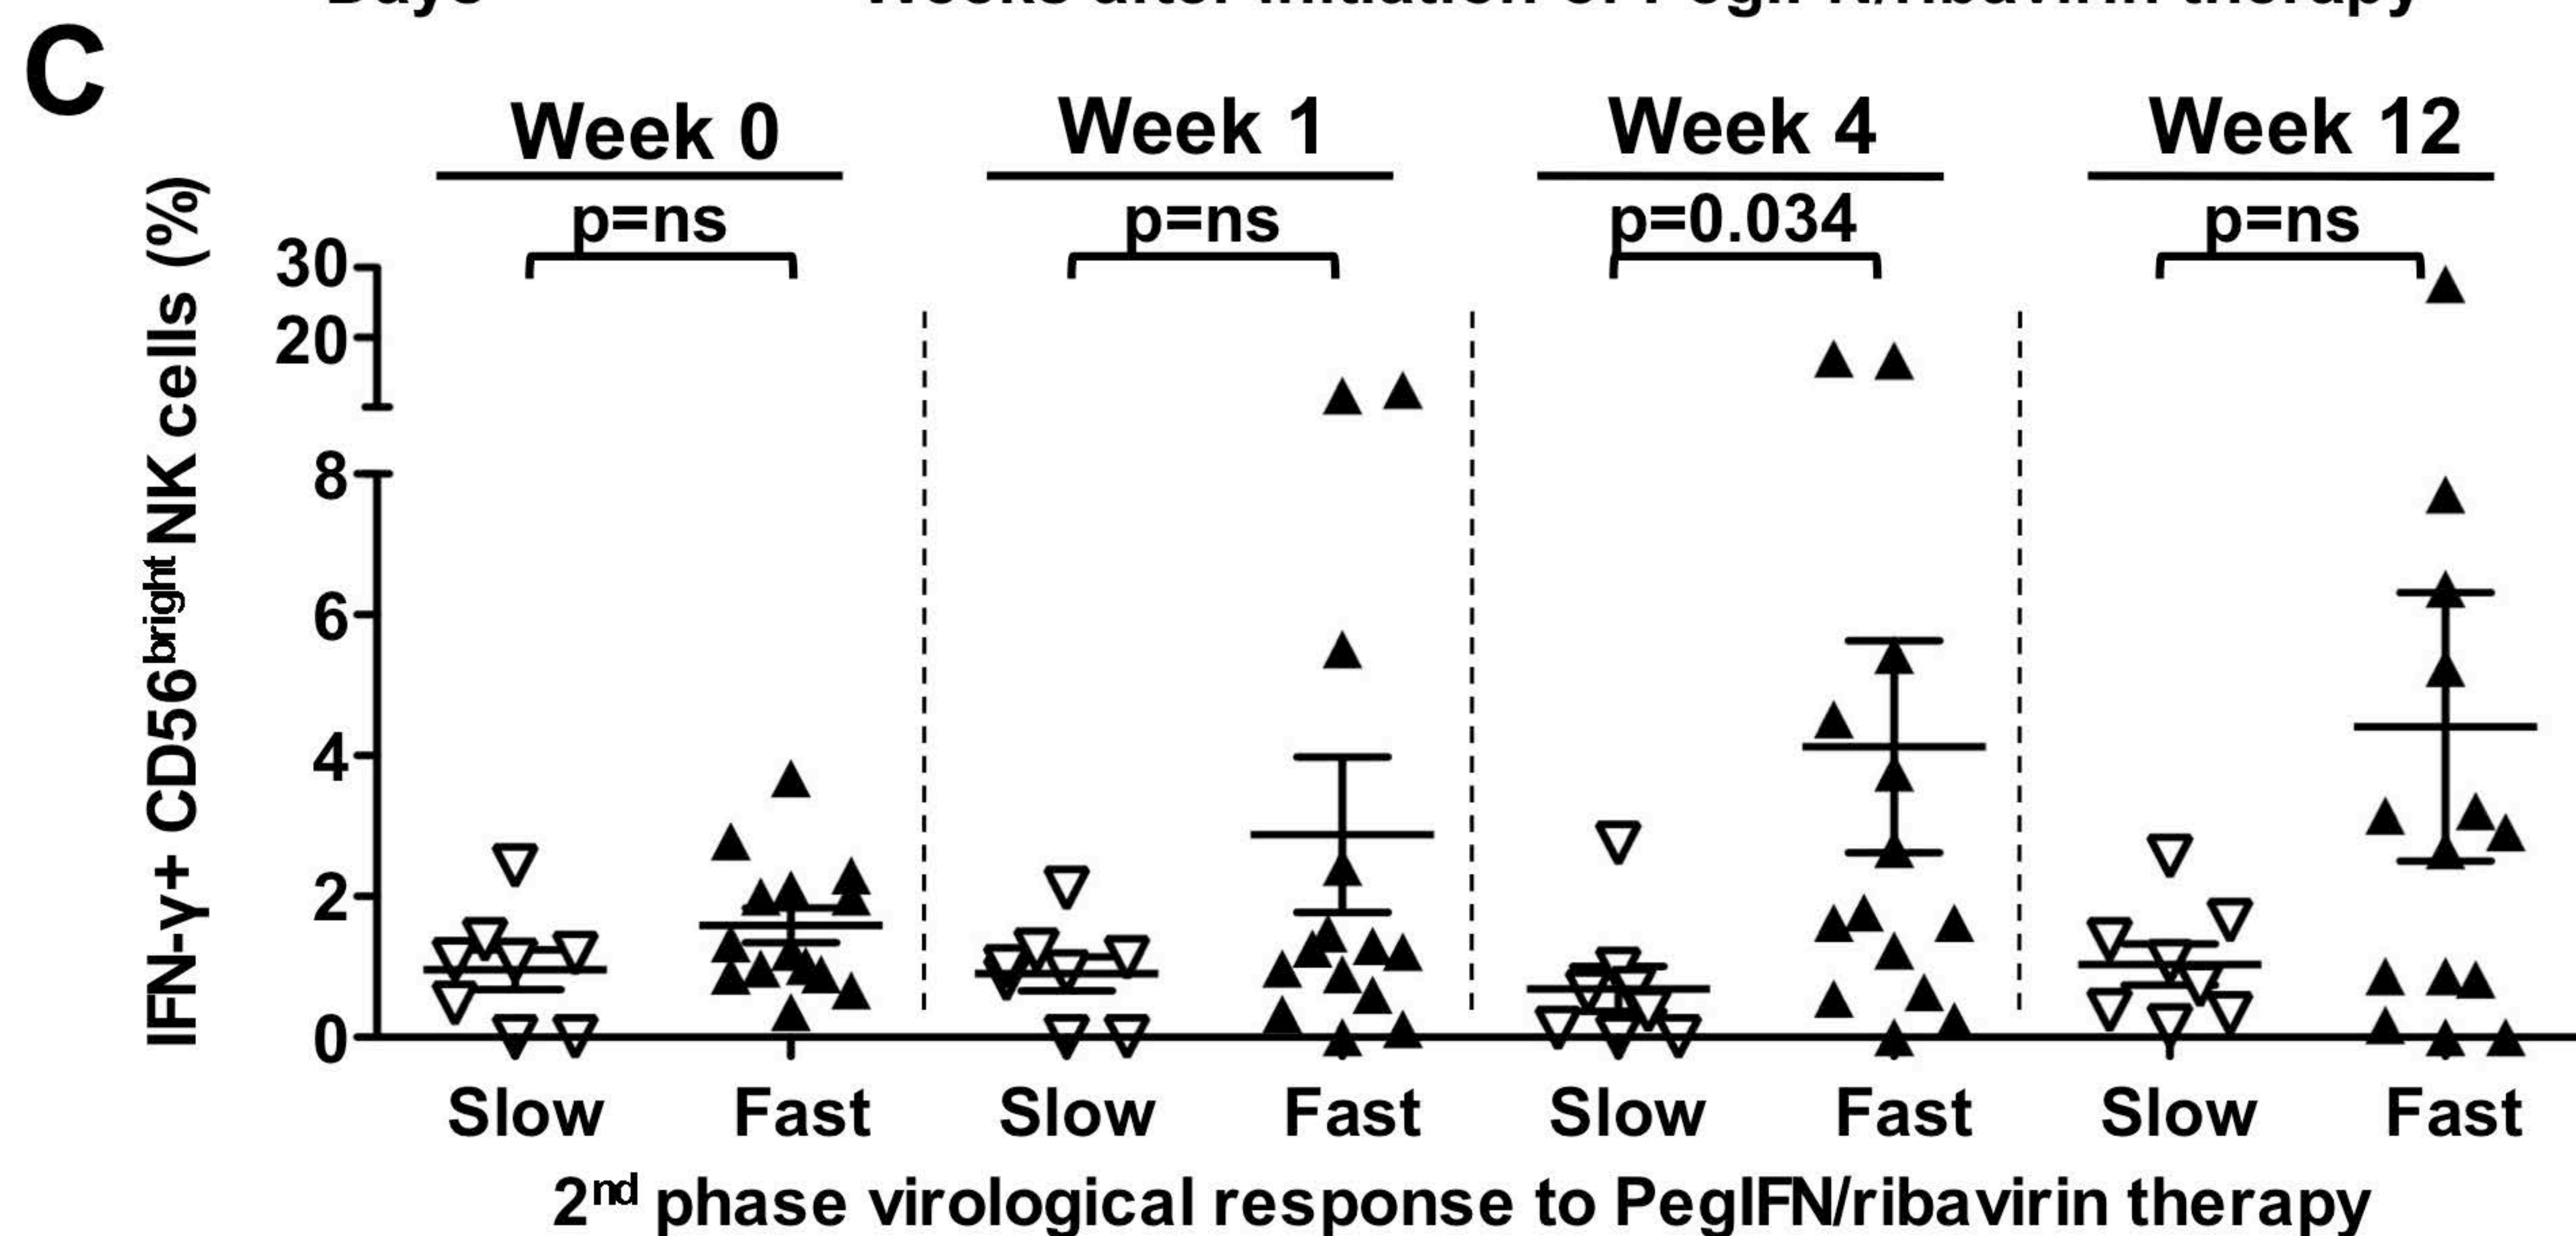

## Supplementary Figure Legend

**Suppl. Fig. 1: A 4-week course of ribavirin pretreatment increases the pSTAT4-dependent IFN- $\gamma$  production of NK cells during subsequent PegIFN/ribavirin therapy.**

**(A-B)** Changes in the frequency of CD3-CD56<sup>+</sup> (A) and CD56<sup>bright</sup> NK cells (B) that produced IFN- $\gamma$  during therapy with PegIFN/ribavirin of patients who either had (solid lines, n=22) or had not (broken lines, n=31) received a 4-week course of ribavirin pretreatment. The frequency of IFN- $\gamma$ -producing NK cells was determined *ex vivo*. Mean  $\pm$  SEM are shown. Asterisks indicate a  $p \leq 0.05$  by unpaired t test for the indicated time point. The comparison of the results from both patient groups by serial measures ANOVA is significant ( $p < 0.0001$  for panel A,  $p < 0.0001$  for panel B).

**(C)** Frequency CD56<sup>bright</sup> NK cells that produced IFN- $\gamma$  in ribavirin-pretreated patients who mounted either a slow (open triangles) or fast (filled triangles) 2<sup>nd</sup> phase virological response to subsequent PegIFN/ribavirin therapy. The frequency of IFN- $\gamma$ -producing NK cells was determined *ex vivo*. Statistical analysis: Mann-Whitney nonparametric two-sample rank test after analysis with the D'Agostino & Pearson omnibus normality test. Mean  $\pm$  SEM are shown.
